# Supplementary material for: RETRACTED: Potential Antitumor Activity of Combined Lycopene and Sorafenib against Solid Ehrlich Carcinoma via Targeting Autophagy and Apoptosis and Suppressing Proliferation
Source: MDPI journal article supplement (doi:10.3390/ph17040527), 2024-04-19
Supplement: s1 [file s1]

Archive with 1 entries (1 files):
- pharmaceuticals-2909124-supplementary.pdf
