# Supplementary material for: RETRACTED: Potential Antitumor Activity of Combined Lycopene and Sorafenib against Solid Ehrlich Carcinoma via Targeting Autophagy and Apoptosis and Suppressing Proliferation
Source: MDPI journal article supplement (doi:10.3390/ph17040527), 2024-04-19
Supplement: s1 [file s1 › pharmaceuticals-2909124-supplementary.pdf]

## Supplementary Materials

### A) IL-1 $\beta$

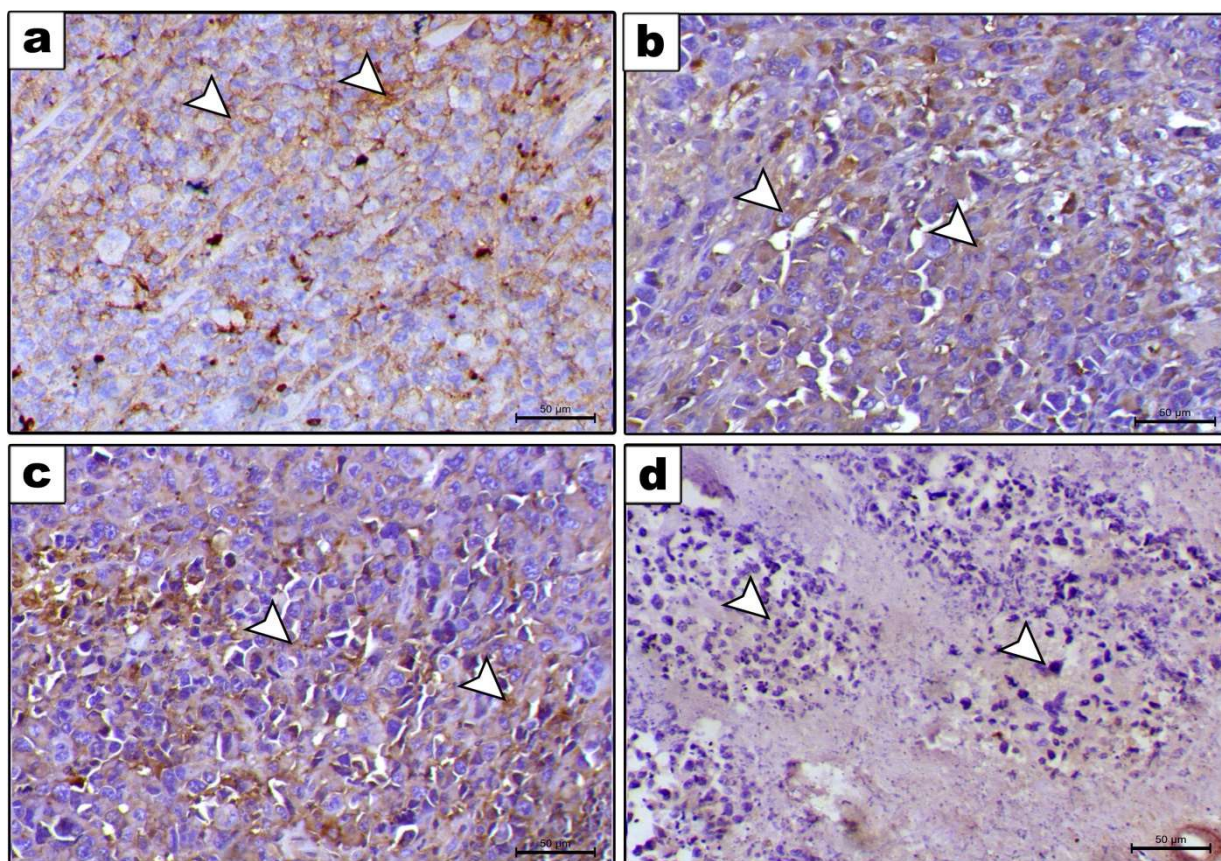

**Figure S1 A. IL-1 $\beta$  expression (200x, scale bar=100  $\mu$ m).** (a) SEC-Control group showed marked immunostaining of IL-1 $\beta$  within the cytoplasm of the neoplastic cells (arrowheads). (b) SEC- SOR group showed a decrease in the immunoexpression of IL-1 $\beta$  expression within the neoplastic cells (arrowheads). (c) SEC-LYC group showed a decrease in the immunoexpression of IL-1 $\beta$  expression within the neoplastic cells (arrowheads). (d) SEC-SOR-LYC group showed a marked decrease in IL-1 $\beta$  expression within the neoplastic cells (arrowheads).

**B) Bcl-2**

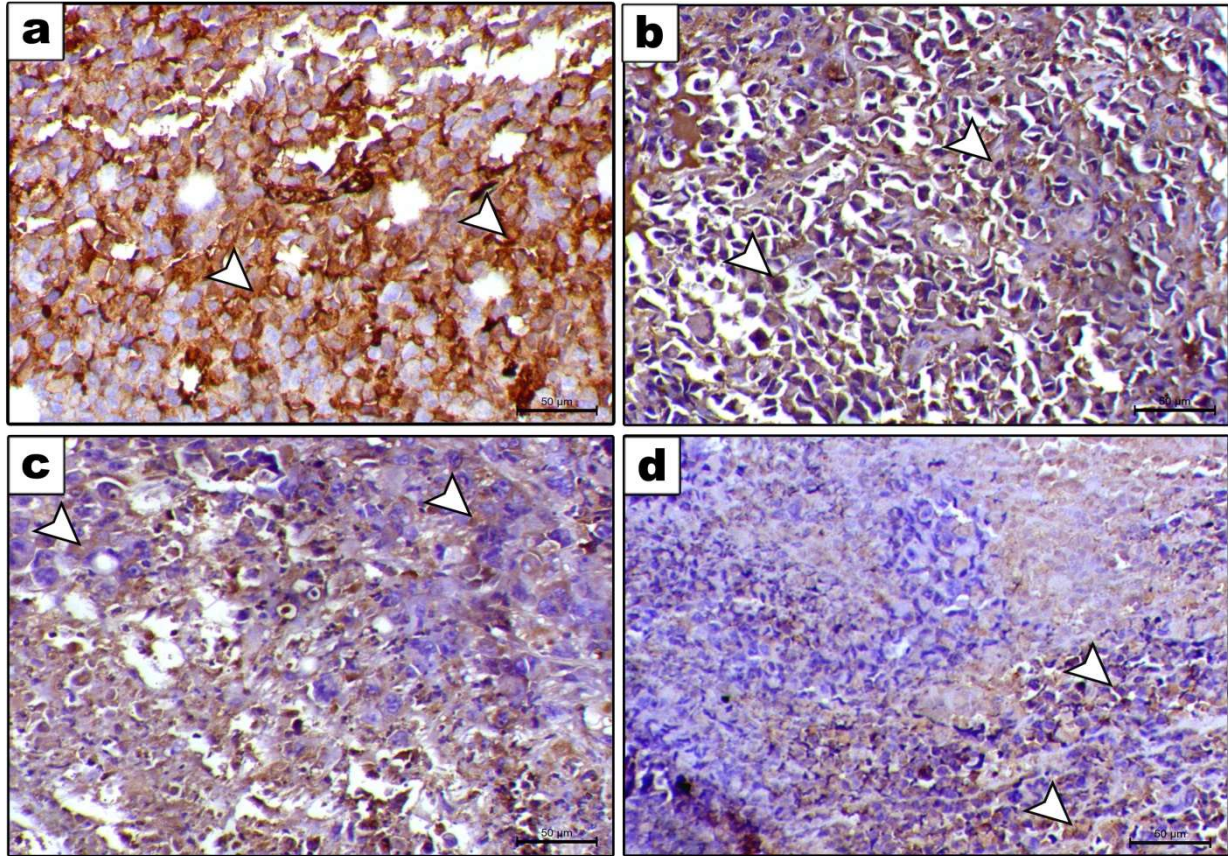

**Figure S1 B. Bcl-2 expression (200x, scale bar=100 μm).** (a) SEC-Control group showed marked cytoplasmic immunoexpression of Bcl2 within (arrowheads). (b) SEC- SOR group showed a decrease in the immunoexpression of Bcl2 within the neoplastic cells (arrowheads). (c) SEC-LYC group showed a decrease in the immunoexpression of Bcl2 within the neoplastic cells (arrowheads). (d) SEC-SOR-LYC group showed a marked decrease in Bcl2 expression within the neoplastic cells (arrowheads).

C) Ki-67

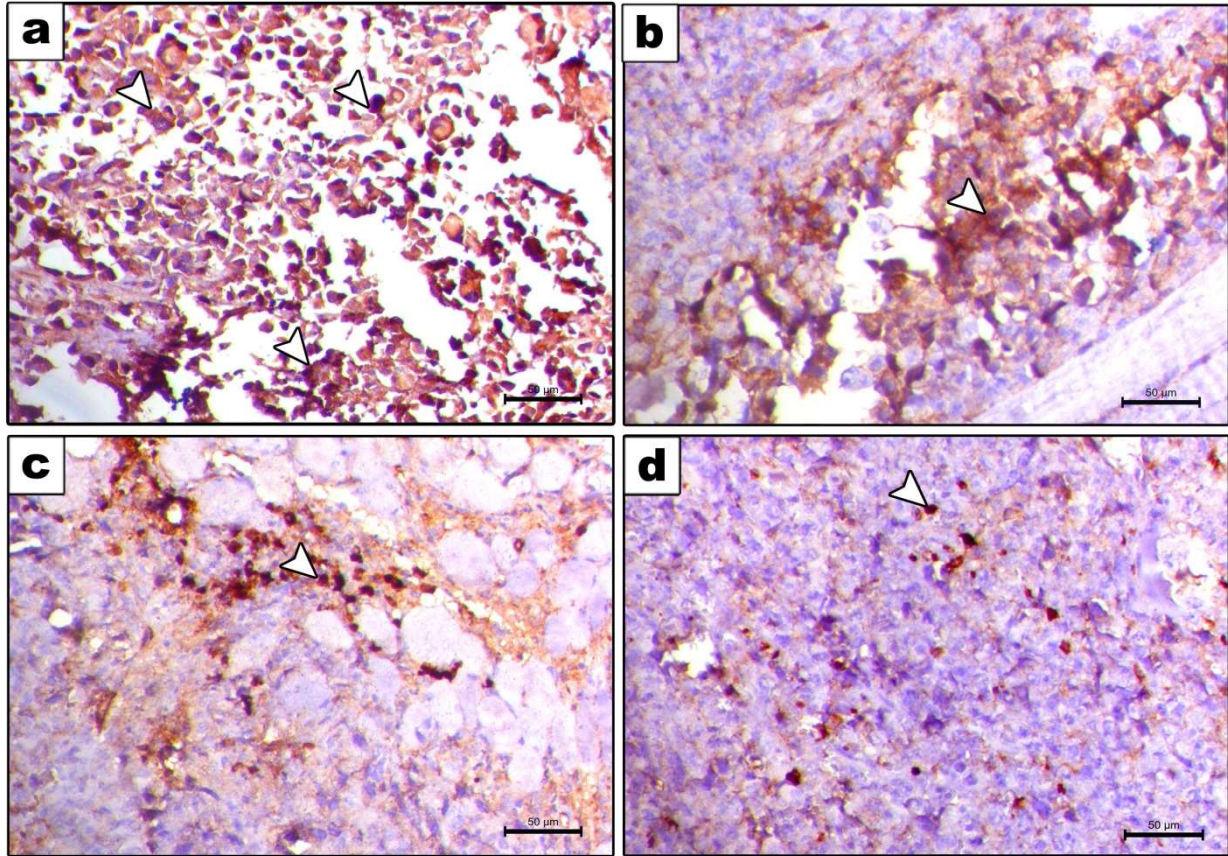

**Figure S1 C. Ki-67 expression (200x, scale bar=100 µm).** (a) SEC-Control group showed marked immunostaining of Ki67 within the proliferated neoplastic cells (arrow). (b) SEC- SOR group showed a decrease in the Ki67 expression within the neoplastic cells (arrow). (c) SEC-LYC group showed a decrease in the Ki67 expression within the neoplastic cells (arrow). (d) SEC-SOR-LYC group showed a marked decrease in Ki67 expression within the proliferated neoplastic cells (arrow).

#### D) Caspase 3

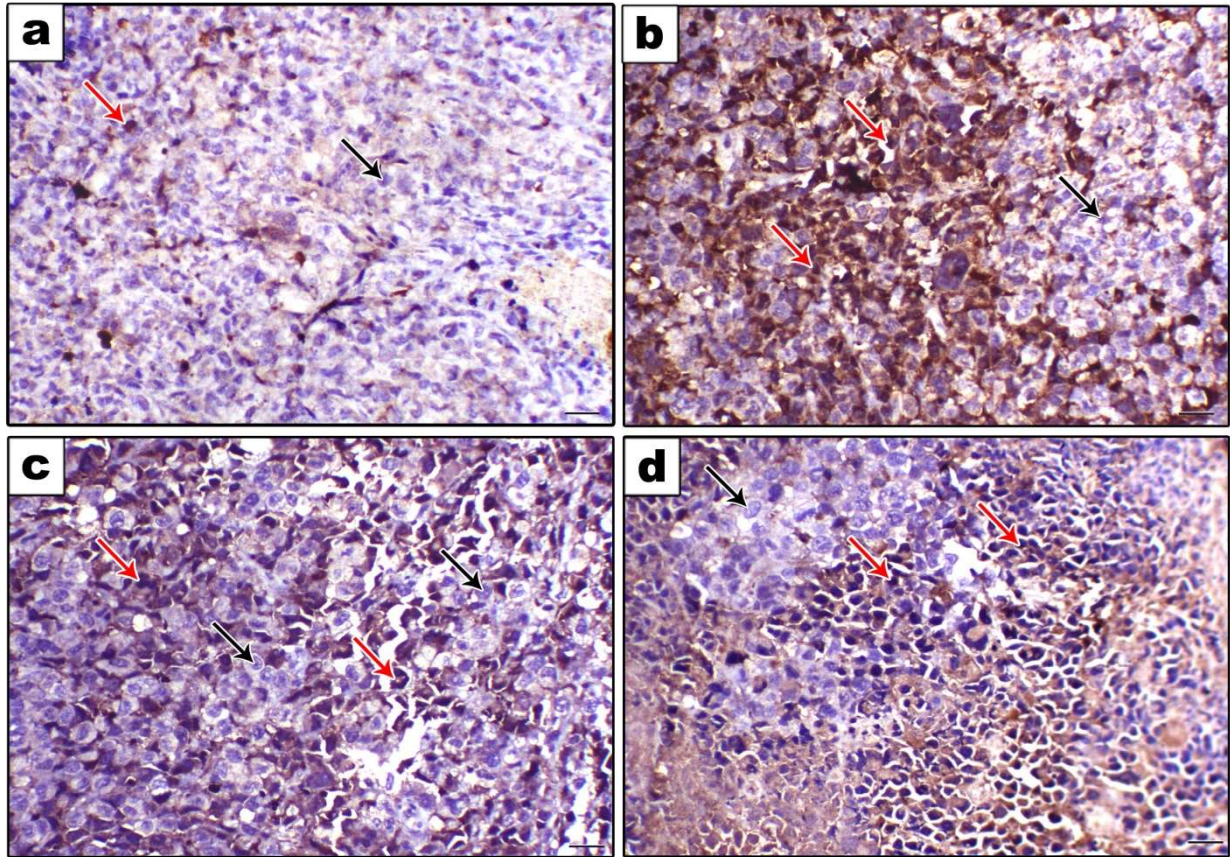

**Figure S1 D. Caspase 3 expression (200x, scale bar=100  $\mu$ m).** (a) SEC-Control group showed a marked decrease in the caspase 3 expression within the neoplastic cells (arrows). (b) SEC- SOR group showed a marked increase in caspase 3 expression (red arrows) within the proliferated neoplastic cells (black arrow). (c) SEC-LYC group showed an increase in caspase 3 expression (red arrows) within the proliferated neoplastic cells (black arrows). (d) SEC-SOR-LYC group showed a marked increase in caspase 3 expression (red arrows) within the proliferated neoplastic cells (black arrow).

#### E) BAX

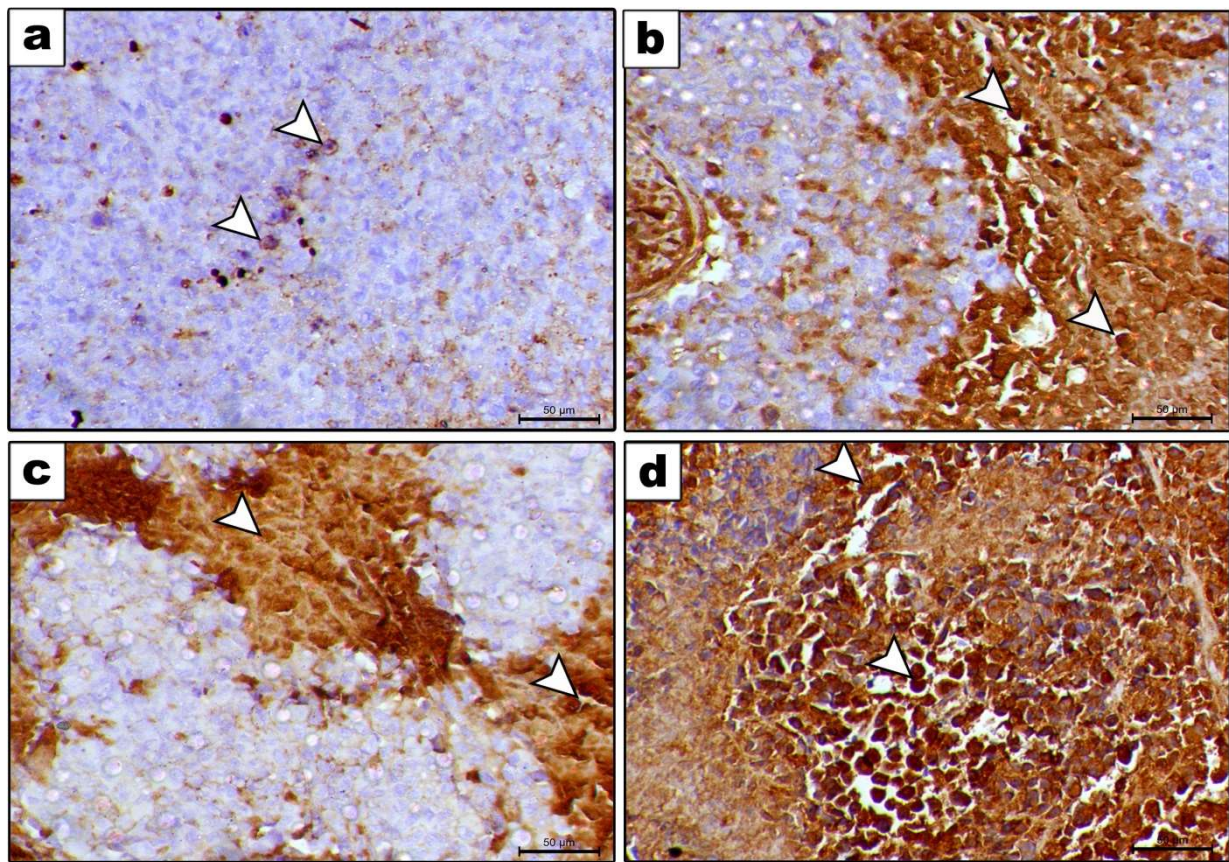

**Figure S1 E. BAX expression (200x, scale bar=100 µm).** (a) SEC-Control group showed mild cytoplasmic and nuclear immunostaining of BAX expression within (arrowheads). (b) SEC-SOR group showed increased immunostaining of BAX expression within the neoplastic cells (arrowheads). (c) SEC-LYC group showed increased immunostaining of BAX expression within the neoplastic cells (arrowheads). (d) SEC-SOR-LYC group showed a marked increase in BAX expression within the neoplastic cells (arrowheads).

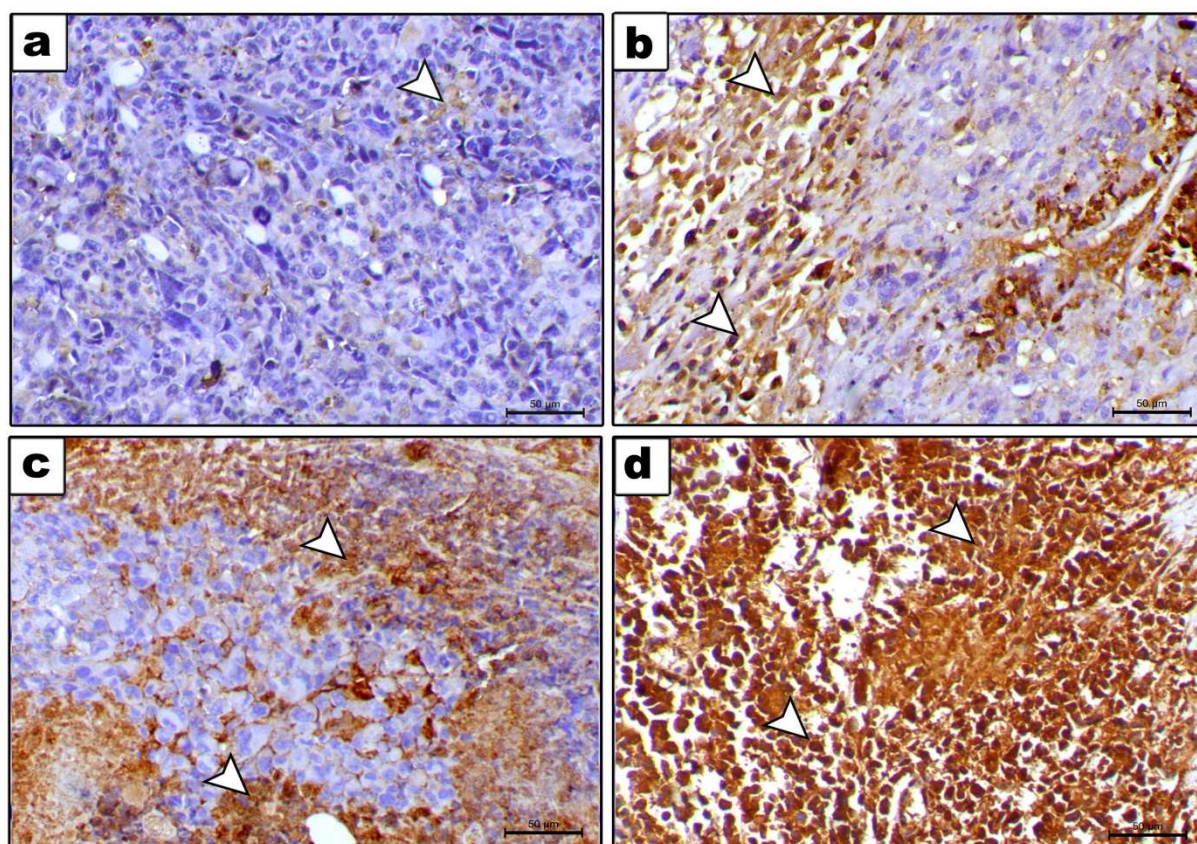

**Figure S1 F. P53 expression (200x, scale bar=100 µm).** (a) SEC-Control group showed mild immunostaining of P53 expression within a few neoplastic cells (arrowheads). (b) SEC-SOR group showed an increase in immunoexpression of P53 within the neoplastic cells (arrowheads). (c) SEC-LYC group showed an increase in immunoexpression of P53 within the neoplastic cells (arrowheads). (d) SEC-SOR-LYC group showed a marked increase in P53 expression within the neoplastic cells (arrowheads).

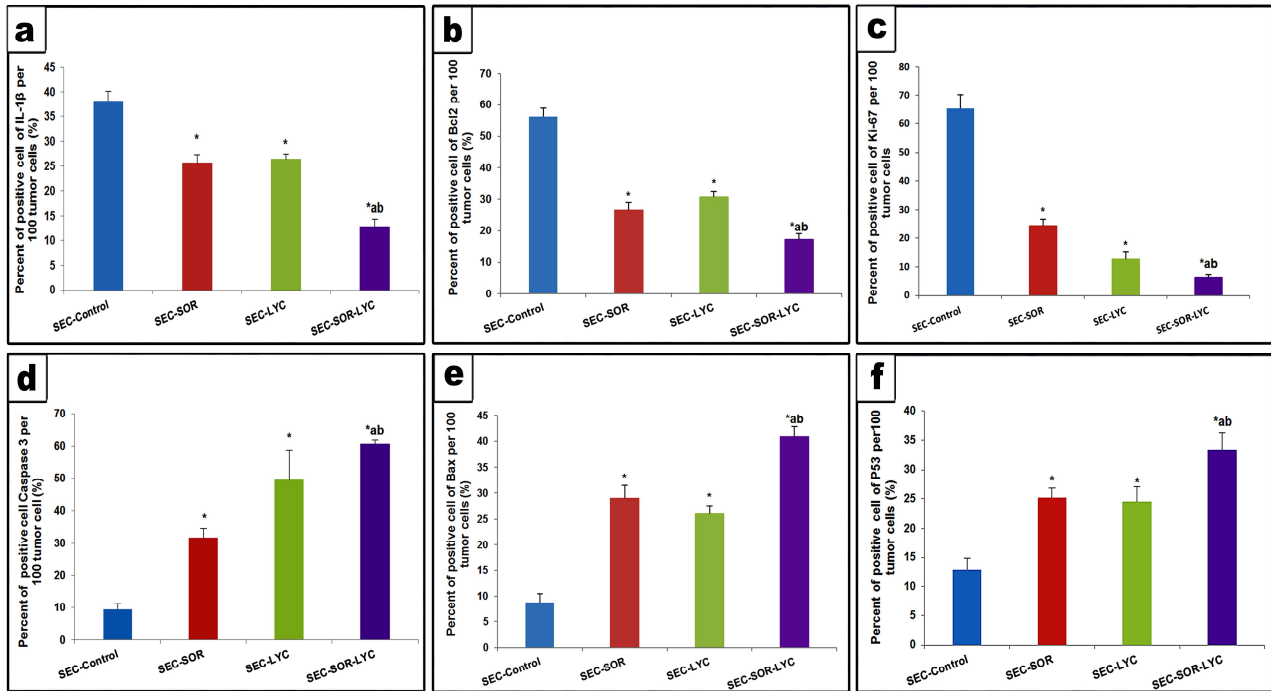

**Figure S2.** Immunohistochemical percent of positive area/8 HPF using Image-J software; version 1.54 D, Java 1.8.0\_354 (NIH, USA) of (a) IL-1 $\beta$ , (b) Bcl2, (c) Ki-67, (d) Caspase 3, (e) BAX and (f) P53. Data were expressed as mean  $\pm$  SD ( $n = 10$ ). Tukey-Kramer multiple comparison tests were used after a one-way analysis of variance (ANOVA) of the data to examine and assess the findings. \* means significant versus the SEC-Control group, <sup>a</sup> means significant versus the SEC-SOR group, and <sup>b</sup> means significant versus the SEC-LYC group. Each group differed significantly from the others at  $p \leq 0.05$ .
